# Supplementary material for: Dietary Supplementation with Probiotic Bacillus licheniformis S6 Improves Intestinal Integrity via Modulating Intestinal Barrier Function and Microbial Diversity in Weaned Piglets
Source: MDPI journal article supplement (doi:10.3390/biology12020238), 2023-02-02
Supplement: s1 [file s1]

---

## Supplementary file

### Dietary Supplementation with Probiotic *Bacillus Licheniformis* S6 Improves Intestinal Integrity via Modulating Intestinal Barrier Function and Microbial Diversity in Weaned Piglets

**Table S1. Compositions and nutrient levels of the basal diet (% , as-fed basis).**

| Ingredients                             | %     |
|-----------------------------------------|-------|
| Corn                                    | 16.4  |
| Extruded corn                           | 32.0  |
| Soybean meal, 46% CP                    | 14.0  |
| Extruded soybean                        | 11.5  |
| Fish meal                               | 5.60  |
| Whey                                    | 15.0  |
| Soybean oil                             | 1.00  |
| Dicalcium phosphate                     | 0.40  |
| Limestone (CaCO <sub>3</sub> )          | 0.75  |
| Salt                                    | 0.40  |
| L-Lysine HCl                            | 1.20  |
| DL-Methionine                           | 0.09  |
| Threonine                               | 0.27  |
| Tryptophan                              | 0.02  |
| Phytase                                 | 0.02  |
| Acidifier                               | 0.35  |
| Vitamin and mineral premix <sup>1</sup> | 1.00  |
| Total                                   | 100   |
| Analyzed nutrient levels                |       |
| Crude protein                           | 19.50 |
| Total Calcium                           | 0.80  |
| Total Phosphorus                        | 0.65  |
| Calculated nutrient levels              |       |
| Metabolizable energy, kcal/kg           | 3400  |
| Lysine, %                               | 1.30  |
| Methionine + cysteine, %                | 0.38  |
| Threonine, %                            | 0.76  |
| Tryptophan, %                           | 0.21  |

<sup>1</sup>Premix supplied per kg of diet: vitamin A, 35.2 mg; vitamin D3, 7.68 mg; vitamin E, 128 mg; vitamin K3, 8.16 mg; vitamin B1, 4 mg; vitamin B2, 12 mg; vitamin B6, 8.32 mg; vitamin B12, 4.8 mg; niacin, 38.4 mg; calcium pantothenate, 25 mg; folic acid, 1.68 mg; biotin, 0.16 mg; iron (FeSO<sub>4</sub> · H<sub>2</sub>O), 171 mg; manganese (MnSO<sub>4</sub> · H<sub>2</sub>O), 42.31 mg; copper (CuSO<sub>4</sub> · 5H<sub>2</sub>O), 125 mg; zinc (ZnSO<sub>4</sub> · H<sub>2</sub>O), 110 mg; selenium (Na<sub>2</sub>SeO<sub>3</sub>), 0.19 mg; cobalt (CoCl<sub>2</sub>), 0.19 mg; iodine (Ca(IO<sub>3</sub>)<sub>2</sub>), 0.54 mg.

**Table S2. List of the primer sequences used for RT-qPCR analysis.**

| Gene Name | Accession number | Primer (5' → 3' )                                     | product size (bp) | Tm (°C) |
|-----------|------------------|-------------------------------------------------------|-------------------|---------|
| GAPDH     | NM_001206359.1   | F: GCTTGTCAATGGAAAGG<br>R: CACACGTAGCACCAGCATCA       | 84                | 60      |
| CAT1      | NM_214301.2      | F: CCTGCAACGTTCTGTAAGGC<br>R: GCTTCATCTGGTCACTGGCT    | 72                | 60      |
| SOD1      | NM_001190422.1   | F: GAAGACAGTGTAGTAACGG<br>R: CAGCCTTGTGTATTATCTCC     | 93                | 60      |
| GPX4      | NM_214407.1      | F: GATTCTGGCCTTCCCTTGC<br>R: TCCCCTTGGGCTGGACTTT      | 173               | 60      |
| Keap 1    | NM_001114671.1   | F: AGCTGGGATGCCTCAGTGTT<br>R: AGGCAAGTTCTCCCAGACATTC  | 100               | 60      |
| Nrf-2     | XM_005671981.3   | F: GACCTTGGAGTAAGTCGAGA<br>R: GGAGTTGTTCTTGTCTTTCC    | 103               | 60      |
| HO-1      | NM_001004027.1   | F: GAGAAGGCTTTAAGCTGGTG<br>R: GTTGTGCTCAATCTCCTCCT    | 74                | 60      |
| NQO1      | NM_001159613.1   | F: GGACATCACAGGTAAACTGA<br>R: TATAAGCCAGAGCAGTCTCG    | 68                | 60      |
| ZO-1      | XM_021098827.1   | F: CGATCACTCCAGCATACAAT<br>R: CACTTGGCAGAAGATTGTGA    | 111               | 60      |
| Occludin  | NM_001163647.2   | F: TCAGGTGCACCCTCCAGATT<br>R: TGGACTTTCAAGAGGCCTGG    | 112               | 60      |
| Claudin1  | NM_001244539.1   | F: CCTCAATACAGGAGGGAAGC<br>R: CTCTCCCCACATTCGAGATGATT | 76                | 60      |
| Mucin-2   | XM_021082584.1   | F: CTGTGTGGGGCCTGACAA<br>R: AGTGCTTGCACTCGAACTCA      | 65                | 60      |

---

**Table S3.** Information about the primary antibodies used for the Western blot experiment

| Antibody                 | Company and Cat. #  | Source    | Reactivity       | Dilution |
|--------------------------|---------------------|-----------|------------------|----------|
| GAPDH                    | CST, #2118S         | Ra.mono.  | H./M./R./etc.    | 1:1000   |
| ZO-1                     | Invitrogen, 61-7300 | Ra. poly. | H./M./R./P./etc. | 1:1000   |
| Occludin                 | Abclonal, A2601     | Ra. poly. | M./R./P./etc.    | 1:1000   |
| HRP-Goat-Anti-rabbit IgG | CST, 7074S          | Goat      | Ra.              | 1:1000   |

H.: human; M.: mouse; R.: rat; Ra.: rabbit; P.: Pig; mono. : monoclonal; poly.: polyclonal.
